# Supplementary material for: Resistance of Mycobacterium tuberculosis to indole 4-carboxamides occurs through alterations in drug metabolism and tryptophan biosynthesis
Source: PubMed Central journal article supplement (PMC8379015; doi:10.1016/j.chembiol.2021.02.023), 2021-08-19
Supplement: mmc1.pdf [file mmc1.pdf]

**Cell Chemical Biology, Volume 28**

**Supplemental information**

**Resistance of *Mycobacterium tuberculosis* to indole**

**4-carboxamides occurs through alterations**

**in drug metabolism and tryptophan biosynthesis**

**M. Daben J. Libardo, Caroline J. Duncombe, Simon R. Green, Paul G. Wyatt, Stephen Thompson, Peter C. Ray, Thomas R. Ioerger, Sangmi Oh, Michael B. Goodwin, Helena I.M. Boshoff, and Clifton E. Barry III**

## Supplemental Text and Figures

### Resistance of *Mycobacterium tuberculosis* to indole 4-carboxamides occurs through alterations in drug metabolism and alterations in tryptophan biosynthesis

M. Daben J. Libardo<sup>1,5,7</sup>, Caroline J. Duncombe<sup>1,7</sup>, Simon R. Green<sup>2</sup>, Paul G. Wyatt<sup>2</sup>, Stephen Thompson<sup>2</sup>, Peter C. Ray<sup>2,6</sup>, Thomas R. Ioerger<sup>3</sup>, Sangmi Oh<sup>1</sup>, Michael B. Goodwin<sup>1</sup>, Helena I.M. Boshoff<sup>1</sup>, Clifton E. Barry III<sup>1,4,8</sup>

<sup>1</sup>Tuberculosis Research Section, Laboratory of Clinical Immunology & Microbiology, National Institute of Allergy and Infectious Diseases, National Institutes of Health, Bethesda, MD 20892

<sup>2</sup>Drug Discovery Unit, Division of Biological Chemistry and Drug Discovery, School of Life Sciences, University of Dundee, UK, DD1 5EH

<sup>3</sup>Department of Computer Science and Engineering, Texas A&M University, College Station, TX 77843

<sup>4</sup>Institute for Infectious Disease and Molecular Medicine, University of Cape Town, Cape Town 7935, South Africa

<sup>5</sup>Present address: Infectious Disease & Vaccines, Merck Research Laboratories, Merck & Co. West Point, PA 19486

<sup>6</sup>Present address: Excentia Ltd., Oxfors OX1 3LD, UK

<sup>7</sup>these authors contributed equally

<sup>8</sup>Lead Contact

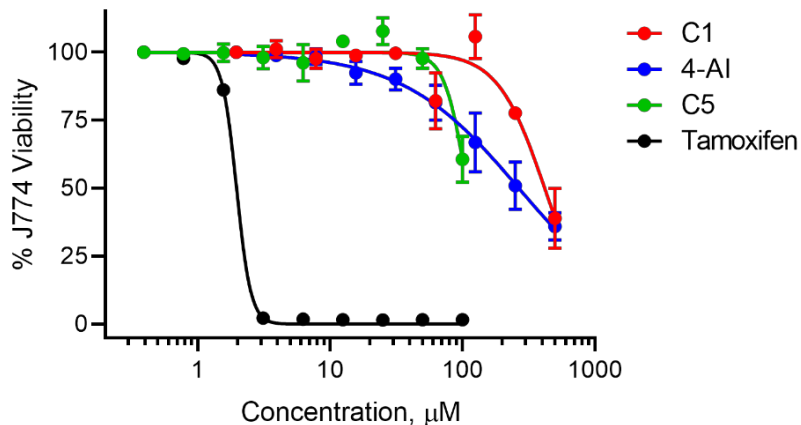

**Figure S1. Cytotoxicity of indole-4-carboxamides and 4-aminoindole, related to Figure 1.** Cytotoxicity of representative compounds in the study was measured using the CellTiter-Glo® luminescent cell viability assay. 10,000 J774 cells were seeded into wells of a 96-well plate and treated with the indicated compounds for 24 hrs. Data represent Mean ± SEM (n = 4).

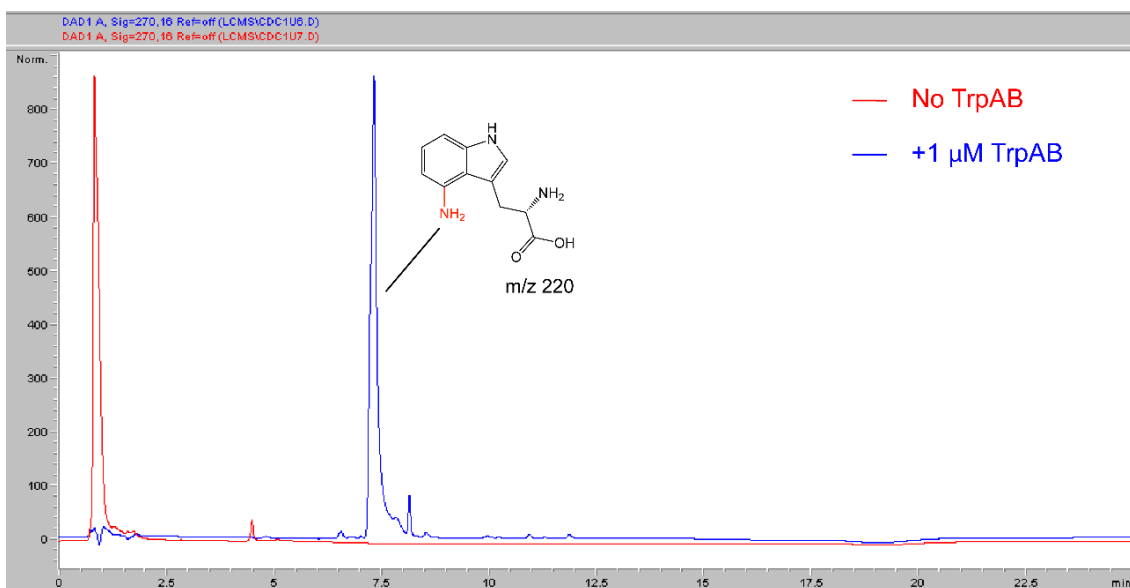

**Figure S2. 4-Aminoindole is a substrate for TrpAB, related to Figure 6.** 4-AI was incubated with  $1\ \mu\text{M}$  TrpAB overnight before quenching the reaction with an equal volume of MeOH. A  $2\ \mu\text{L}$  aliquot of the reaction mixture was injected into the LC-MS to detect formation of 4-amino-L-Trp. Chromatograms are representative of three individual trials.

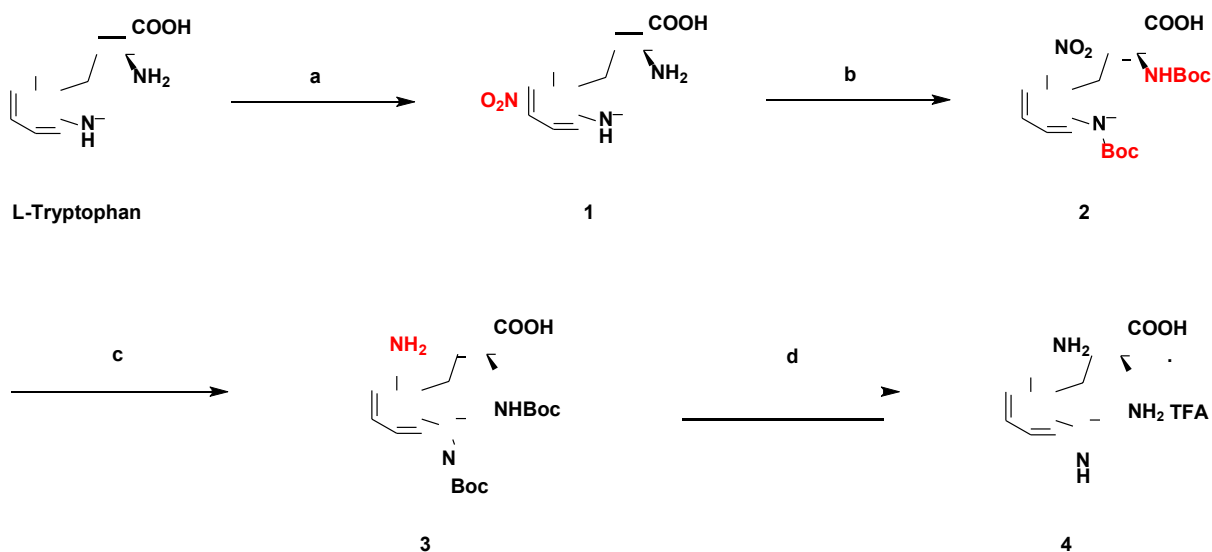

**Figure S3. Chemical synthesis of 4-amino-L-Tryptophan, related to Figure 6.** Reagents and conditions: (a) 70%  $\text{HNO}_3$  (3 eq), AcOH,  $\text{H}_2\text{O}$ , rt, 4 h; (b) Boc anhydride (3 eq), DMAP (3 eq),  $\text{NET}_3$  (4 eq), DCM, rt, overnight; (c) Pd/C,  $\text{H}_2$ , rt, 3 h; (d) TFA, MC, rt, 2 h.

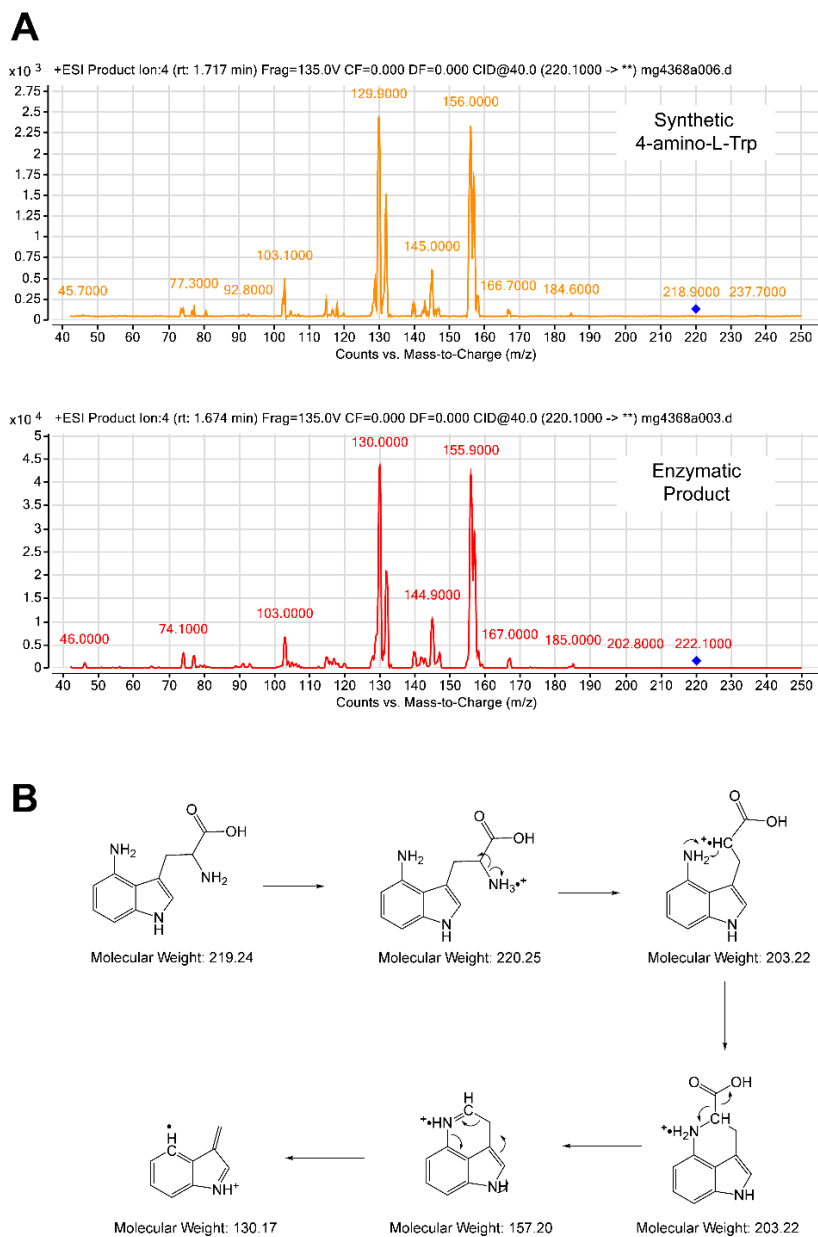

**Figure S4. Fragmentation patterns of synthetic 4-amino-L-trp match the enzyme reaction product observed from 4-AI, related to Figure 6 (A) Triple quadrupole tandem MS fragmentation of synthetic 4-amino-L-Trp (top) and the enzymatic product obtained by incubating TrpAB with 4-AI (bottom). (B) Possible mechanism of fragmentation of 4-amino-L-Trp to account for the observed m/z in panel A and in Figure 6B and 6C.**

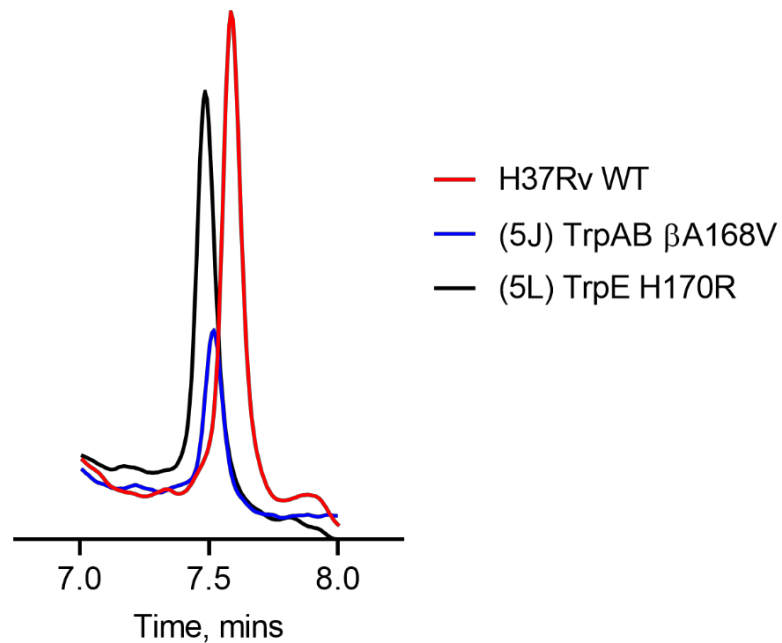

**Figure S5. TrpAB mutant is less active than wild type in converting 4-AI to 4-a-Trp, Related to Figure 6.** LC-MS chromatograms (270 nm) obtained when 4-AI was incubated with H37Rv WT or representative resistant mutants. The peak represent an m/z of 220.1 accounting for intracellular formation of 4-amino-L-Trp.

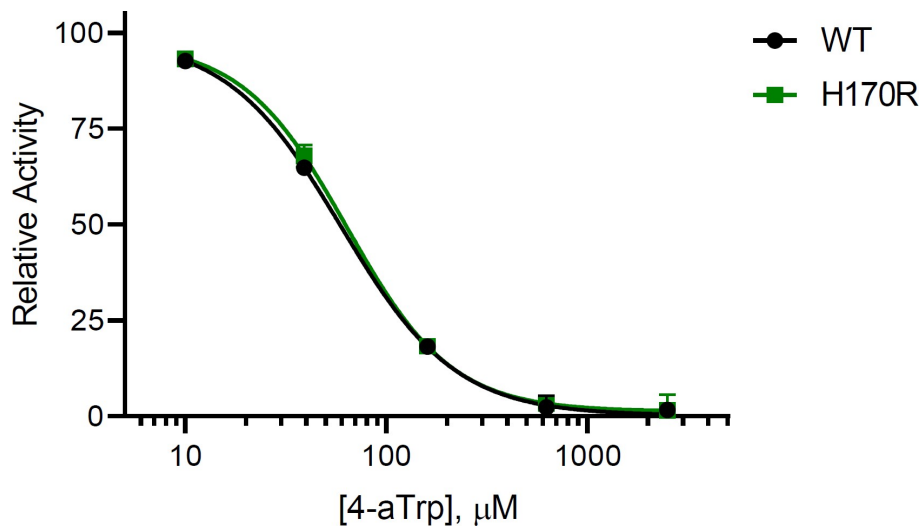

**Figure S6. 4-Amino-Trp does not cause feedback inhibition of TrpE, Related to Figure 6.** Inhibition of TrpE by 4-AI occurs with a high IC50 value of 60  $\mu$ M. In addition, the mutant H170R which alleviates allosteric regulation by tryptophan, supporting that 4-a-Trp does not inhibit TrpE.

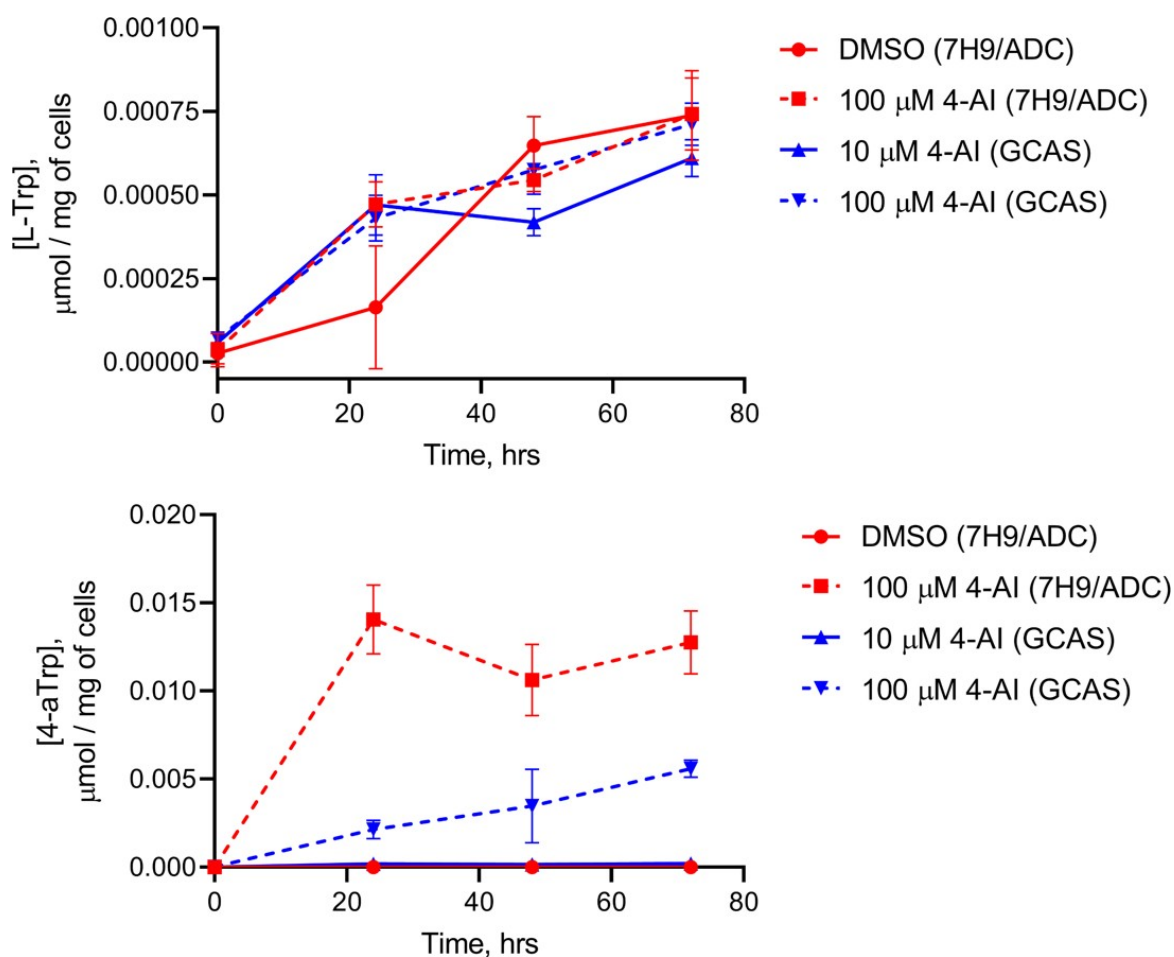

**Figure S7. 4-AI incorporation into 4-a-Trp does not depress cellular levels of L-Trp, Related to Figure 6.** Incorporation of 4-AI into whole cells of Mtb and the impact on intracellular L-tryptophan (top) and 4-a-Trp (bottom) levels.

**Table S1. Minimum Inhibitory Concentration (MIC) of Indole-4-carboxamides in various growth media against Mtb and other mycobacteria, related to Table 1.**

| Compound  | MIC vs <i>M. tuberculosis</i> H37Rv, $\mu\text{M}$ |          |         | MIC vs <i>M. bovis</i> BCG, $\mu\text{M}$ |          | MIC vs <i>M. smegmatis</i> mc <sup>2</sup> 155, $\mu\text{M}$ |
|-----------|----------------------------------------------------|----------|---------|-------------------------------------------|----------|---------------------------------------------------------------|
|           | 7H9/ADC                                            | 7H9/GCas | GAST-Fe | 7H9/ADC                                   | 7H9/GCas | 7H9/GCas                                                      |
| <b>C1</b> | 12.5                                               | 1.56     | 6.25    | 100                                       | 6.25     | >100                                                          |
| <b>C2</b> | 25                                                 | 3.12     | 25      | >100                                      | 12.5     | >100                                                          |
| <b>C3</b> | >100                                               | 6.25     | >100    | >100                                      | 50       | >100                                                          |
| <b>C4</b> | 25                                                 | 3.12     | 50      | >100                                      | 12.5     | >100                                                          |

**Table S2. Minimum Inhibitory Concentration (MIC) of 4-aminoindole and the corresponding free carboxylic acid building blocks of the NMMV03 compounds against Mtb H37Rv, related to Figure 2.**

| Compound      | Structure                                                                           | MIC, $\mu\text{M}$<br>(7H9/GCas) |
|---------------|-------------------------------------------------------------------------------------|----------------------------------|
| 4-aminoindole | 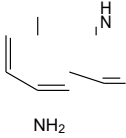   | 4.68                             |
| C1-COOH       |    | 50                               |
| C2-COOH       |    | >100                             |
| C3-COOH       |   | >100                             |
| C4-COOH       |  | >100                             |



**Table S3. MIC of similar compounds lacking the 4-aminoindoleamide, related to Figure 2.** Minimum Inhibitory Concentration (MIC) of representative members of the compound cluster against Mtb H37Rv.

| Compound | Structure | MIC, $\mu\text{M}$<br>(7H9/GCAs) |
|----------|-----------|----------------------------------|
| C6       |           | 50                               |
| C7       |           | 50                               |
| C8       |           | 9.4                              |
| C9       |           | 50                               |
| C10      |           | 50                               |
| C11      |           | 50                               |
| C12      |           | 50                               |

|     |  |      |
|-----|--|------|
| C13 |  | 25   |
| C14 |  | 50   |
| C15 |  | 50   |
| C16 |  | 2.3  |
| C17 |  | 1.56 |
| C18 |  | 3.13 |
| C19 |  | 3.13 |
| C20 |  | 4.7  |

|     |                                                                                   |      |
|-----|-----------------------------------------------------------------------------------|------|
| C21 | 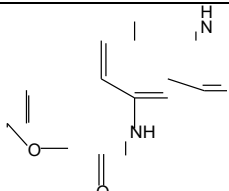 | 6.25 |
|-----|-----------------------------------------------------------------------------------|------|

**Table S4. C5-resistant mutants remain sensitive to indole-4-carboxamides, related to Figure 5.** Mtb H37Rv C5<sup>R</sup> mutant MIC against indole-4-carboxamides and the corresponding mutations found via whole genome sequencing.

| C5 <sup>R</sup> Strain  | MIC, $\mu\text{M}$<br>(7H9/GCas) |      |      |      |      |      |      |
|-------------------------|----------------------------------|------|------|------|------|------|------|
|                         | C1                               | C2   | C3   | C4   | 4-AI | C5   | INH  |
| WT                      | 3.12                             | 6.25 | 12.5 | 6.25 | 6.25 | 0.39 | 0.16 |
| A1 ( <i>trpB</i> F188S) | 1.56                             | 3.12 | 12.5 | 3.12 | 6.25 | >100 | 0.16 |
| A2 ( <i>trpB</i> Y200C) | 6.25                             | 6.25 | 12.5 | 6.25 | 6.25 | >100 | 0.16 |
| A4 ( <i>trpA</i> P65L)  | 3.12                             | 6.25 | 12.5 | 6.25 | 6.25 | >100 | 0.16 |
| B2 ( <i>trpA</i> D136N) | 3.12                             | 6.25 | 12.5 | 6.25 | 6.25 | >100 | 0.16 |

Table S5. Oligonucleotides used in this study, related to STAR methods.

|                                    |                                                                                   |                      |
|------------------------------------|-----------------------------------------------------------------------------------|----------------------|
| Primers for Psmc promoter swap     | GTGTTCTAGAGGATCGTCGGCACC                                                          | P <sub>smyc</sub> -F |
|                                    | GCGCCCATGGAGATACCTCCTTAATTAAGCATGCGGATC                                           | P <sub>smyc</sub> -R |
| Primers for AmiC cloning           | GCTACCATGGGCATGTCGCGGTACACG                                                       | AmiC_pMV306-F        |
|                                    | GCTAATCGATCTACTCGGCGATATTTGGGGCGTGG                                               | AmiC_pMV306-R        |
| Primers for TrpB recombineering    | GAGACCGGTGCCGGCCAGCACGGGGTCGCCACGGT <u>CAC</u><br>CGCATGCGCATTGCTCGGCCTGGACTGTGTC | TrpB-A134V_Rec       |
|                                    | GCGCTAAACGTGGCCCGGATGCGATTGCTGGGT <u>GTCGAA</u><br>GTCGTCGCGGTTCAGACGGGCTCGAAAACG | TrpB-A168V_Rec       |
| Primer for TrpE recombineering     | CTGTTGCTGGCCACCGATGTGGCGCGGT <u>CGATCGCCA</u><br>CGAGGGCACCATCACGTTGATCGCCAACGCC  | TrpE-H170R_Rec       |
| Primer for RpsL recombineering     | GCGGGCAACCTTCCGAAGCGCCGAGTTCGGCTT <u>CCTCG</u><br>GAGTGGTGGTGTACACGCGGGTGCATACACC | RpsL-K43R_Rec        |
| Primers for confirming TrpB        | CGATCTGGTTACCGCGGG                                                                | TrpB_RecCheck-F      |
|                                    | CCCGGTCGGCAAGTAACC                                                                | TrpB_RecCheck-R      |
| Primers for confirming TrpE        | GCCCGACTCCTTGCGC                                                                  | TrpE_RecCheck-F      |
|                                    | CCGATGACCACCCAGGG                                                                 | TrpE_RecCheck-R      |
| Primers for confirming RpsL        | AGTTTGAGGCAAGCTATG                                                                | RpsL_RecCheck-F      |
|                                    | CCCTTCAACAGAACCTTG                                                                | RpsL_RecCheck-R      |
| Primers for TrpE overexpression    | GCTACATATGCACGCCGACCTC                                                            | TrpE_pET28a-Exp-F    |
|                                    | GCTAAAGCTTTTAGCAGCCACTGCG                                                         | TrpE_pET28a-Exp-R    |
| Primers for TrpE H170R mutagenesis | GCGGT <u>CGATCg</u> CCACGAGGGC                                                    | TrpE-H170R-F         |
|                                    | CGCCACATCGGTGGCCAG                                                                | TrpE-H170R-R         |
| Primers for TrpB overexpression    | GCTAAAGCTTATGAGTGCTGCCATC                                                         | TrpB_pRSFDuet-F      |
|                                    | GCTAAAGCTTTCAGTCGTTGCCAG                                                          | TrpB_pRSFDuet-R      |
| Primers for TrpA overexpression    | GCTACATATGGTGGCGGTGGAAC                                                           | TrpA_pRSFDuet-F      |
|                                    | GCTACTCGAGTCATGCGGACATCC                                                          | TrpA_pRSFDuet-R      |
| Primers for AmpR for TrpA cloning  | CATGCCATGGGAATGGTGGCGGTGGAACAG                                                    | TrpA_AmpR-F          |
|                                    | CCCAAGCTTTCATGCGGACATCCCTAG                                                       | TrpA_AmpR-R          |
| Primers for TrpB mutagenesis A168V | GTCGCCACGGtCACCGCATGC                                                             | TrpB-A168V_SDM-F     |
|                                    | CCCGTGCTGGCCGGCACC                                                                | TrpB-A168V_SDM-R     |
| Primers for TrpB mutagenesis D261G | TTTCTCGATGgCCCAGGCGTA                                                             | TrpB-D261G_SDM-F     |
|                                    | CGCATGAAAAATACCAATGGC                                                             | TrpB-D261G_SDM-R     |
| Primers for TrpCF expression       | GCTACATATGATGATGCAAACCGTTTTAGC                                                    | Ec_TrpCF_Exp-F       |
|                                    | GCTAAAGCTTTTAATATGCGCGCAGCG                                                       | Ec_TrpCF_Exp-R       |
